# Supplementary material for: Optical properties, oxidative potential and chemical composition of brown carbon in the megacity Shenyang of Northeast China
Source: Royal Society of Chemistry journal article supplement (doi:10.1039/d5em00804b), 2026-01-01
Supplement: d5em00804b1.pdf [file d5em00804b1.pdf]

**Supporting Information**

**Optical Property, Oxidative Potential and Chemical Composition of Brown**

**Carbon in the Megacity Shenyang of Northeast China**

Jianwei Zheng<sup>a</sup>, Wangjin Yang<sup>a,\*</sup>, Hao Na<sup>a</sup>, Hongxing Yang<sup>a</sup>, Fu Li<sup>a</sup>, Shaojie Yang<sup>a</sup>,  
Ning Tang<sup>b</sup>, Chong Han<sup>a,\*</sup>

<sup>a</sup> School of Metallurgy, Northeastern University, Shenyang, 110819, China

<sup>b</sup> Institute of Nature and Environmental Technology, Kanazawa University,  
Kanazawa 920-1192, Japan

\*To Whom Correspondence Should Be Addressed:

hanch@smm.neu.edu.cn; yangwj@smm.neu.edu.cn

**Summary**

Text S1

Table S1 to S8

Fig. S1 to S13

Table S1. The structural formula of target compounds.

| Type                                                | Compounds                         | Structural formula                                                                    |
|-----------------------------------------------------|-----------------------------------|---------------------------------------------------------------------------------------|
| Polycyclic aromatic hydrocarbons (PAHs)             | Phenanthrene<br>(Phe)             | 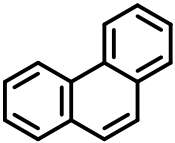   |
|                                                     | Fluorene<br>(Flu)                 |    |
|                                                     | Fluoranthene<br>(Fla)             |    |
|                                                     | Pyrene<br>(Pyr)                   |    |
|                                                     | Perylene<br>(Per)                 |   |
| Oxygenated polycyclic aromatic hydrocarbons (OPAHs) | Anthraquinone<br>(AQ)             |  |
|                                                     | Naphthalene-1,4-Dione<br>(1,4-NQ) |  |
|                                                     | 9-Fluorenone<br>(9-Flu)           |  |
|                                                     | 1,4-Anthraquinone<br>(1,4-AQ)     |  |

|                                                   |                                     |                                                                                       |
|---------------------------------------------------|-------------------------------------|---------------------------------------------------------------------------------------|
| Nitrated polycyclic aromatic hydrocarbons (NPAHs) | 9,10-Phenanthraquinone<br>(9,10-PQ) | 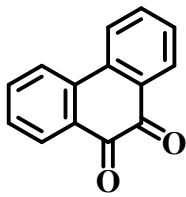   |
|                                                   | 5-Nitracenaphthene<br>(5-NAce)      |    |
|                                                   | 2-Nitrofluorene<br>(2-NF)           |    |
|                                                   | 2,7-Dinitrofluorene<br>(2,7-DNF)    |    |
|                                                   | 9-Nitroanthracene<br>(9-NAnt)       |   |
|                                                   | 1-Nitropyrene<br>(1-NP)             |  |

30

31

Table S2. Sampling dates of PM<sub>2.5</sub>.

| Seasons      | Sampling dates  |
|--------------|-----------------|
| Spring (Spr) | 25–27 May. 2023 |
| Summer (Sum) | 21–23 Aug. 2023 |
| Autumn (Aut) | 9–11 Nov. 2023  |
| Winter (Win) | 9–11 Feb. 2023  |

32

33

Table S3. Meteorological conditions of the sampling days.

| Date         | Temperature (°C) | Mean relative humidity (%) | Mean wind speed (m s <sup>-1</sup> ) |
|--------------|------------------|----------------------------|--------------------------------------|
| 25 May. 2023 | 16.30 ~ 22.30    | 47.20                      | 4.90                                 |
| 26 May. 2023 | 12.80 ~ 27.10    | 65.00                      | 2.50                                 |
| 27 May. 2023 | 12.10 ~ 23.70    | 69.90                      | 2.40                                 |
| 21 Aug. 2023 | 21.50 ~ 25.10    | 84.10                      | 1.50                                 |
| 22 Aug. 2023 | 15.60 ~ 28.00    | 80.80                      | 1.00                                 |
| 23 Aug. 2023 | 17.20 ~ 29.40    | 75.20                      | 1.10                                 |
| 9 Nov. 2023  | -5.60 ~ 0.20     | 52.30                      | 3.10                                 |
| 10 Nov. 2023 | -11.10 ~ -3.00   | 65.20                      | 1.40                                 |
| 11 Nov. 2023 | -12.20 ~ -2.50   | 66.40                      | 1.40                                 |
| 9 Feb. 2023  | -9.30 ~ 2.80     | 47.90                      | 1.40                                 |
| 10 Feb. 2023 | -8.10 ~ 2.90     | 81.70                      | 1.40                                 |
| 11 Feb. 2023 | -5.30~3.80       | 68.90                      | 2.10                                 |

34

35

Table S4. The concentration of inorganic salts and metal ions in WSBrc.

| Type                 | Ions                                        | Concentration (mg L <sup>-1</sup> ) |
|----------------------|---------------------------------------------|-------------------------------------|
| Inorganic salts ions | F <sup>-</sup>                              | 3.61                                |
|                      | Cl <sup>-</sup>                             | 71.60                               |
|                      | NO <sub>2</sub> <sup>-</sup>                | 0.99                                |
|                      | Br <sup>-</sup>                             | 2.75                                |
|                      | SO <sub>4</sub> <sup>2-</sup>               | 89.00                               |
|                      | NO <sub>3</sub> <sup>-</sup>                | 122.00                              |
|                      | C <sub>2</sub> O <sub>4</sub> <sup>2-</sup> | 1.07                                |
|                      | PO <sub>4</sub> <sup>2-</sup>               | 0.34                                |
| Metal ions           | Fe <sup>2+</sup>                            | 0.47                                |
|                      | Fe <sup>3+</sup>                            | 0.25                                |
|                      | Mn <sup>2+</sup>                            | 1.17                                |

36

### 37 **Text S1. GC-MS analysis of target compounds**

38 The concentrations of PAHs and their derivatives were quantified using the external  
39 calibration method. Standards with the concentrations of 0.25, 0.50, 0.75 and 1.00  $\mu\text{g}$   
40  $\text{mL}^{-1}$  were prepared, and multi-point calibration curves were constructed ( $\text{Area} = \text{slope}$   
41  $\times C_{\text{TC}} + \text{intercept}$ ).  $C_{\text{TC}}$  represents the concentrations of target compounds. The linear  
42 regressions all showed excellent correlation ( $R^2 = 0.994\text{--}0.999$ ; Table S4), confirming  
43 the reliability of quantification. The concentration of target compounds in the BrC  
44 extract were calculated from the calibration equation and then converted to ambient  
45 concentration using sampling volumes.

46 Spike recovery experiments were conducted using blank quartz fiber filters as the  
47 matrix. A known amount of standard solution containing target compounds was added  
48 dropwise onto pre-baked blank filters, and the solvent was evaporated under a gentle  
49 stream of  $\text{N}_2$ . The spiked filters were then extracted, filtered and analyzed using the  
50 same procedure as real samples. Recoveries were calculated as the ratio of the measured  
51 concentration to the spiked concentration, with average values ranging from 89% to  
52 101% for the target compounds (Table S5).

$$53 \quad \text{Recovery} = \frac{C_{\text{measured}}}{C_{\text{spiked}}} 100\% \quad (\text{S1})$$

54 The measurement uncertainty was assessed following established analytical  
55 guidance. Major sources of uncertainty included errors associated with calibration  
56 regression parameters, instrumental repeatability, recovery variability, extraction and  
57 sampling volumes, and dilution factors. These contributions were combined by error  
58 propagation to derive a combined standard uncertainty, which expanded with a  
59 coverage factor of  $k = 2$ , yielded an overall uncertainty of approximately  $\pm 10\%$ . This  
60 level of uncertainty was within the acceptable range for the quantitative analysis of  
61 trace organic pollutants in atmospheric samples.

62

63 Table S5. Standard curves of peak area (A) as a function of concentration ( $\mu\text{g mL}^{-1}$ ),  
 64 characteristic ions and recoveries (R, %) for the target compounds.

| Compounds | Standard curves                                        | m/z | R (%) |
|-----------|--------------------------------------------------------|-----|-------|
| Phe       | $A = 1615884.91 C_{\text{TC}} - 6155.36, R^2 = 0.997$  | 178 | 95    |
| Flu       | $A = 943744.25 C_{\text{TC}} - 1203.11, R^2 = 0.999$   | 166 | 96    |
| Fla       | $A = 1497641.60 C_{\text{TC}} - 3939.00, R^2 = 0.998$  | 202 | 100   |
| Pyr       | $A = 1518207.60 C_{\text{TC}} + 35776.00, R^2 = 0.996$ | 202 | 101   |
| Per       | $A = 1733254.00 C_{\text{TC}} - 41725.00, R^2 = 0.998$ | 252 | 99    |
| 1,4-NQ    | $A = 474697.60 C_{\text{TC}} - 8498.50, R^2 = 0.996$   | 158 | 90    |
| 1,4-AQ    | $A = 254565.60 C_{\text{TC}} - 1754.50, R^2 = 0.999$   | 216 | 92    |
| AQ        | $A = 854414.80 C_{\text{TC}} + 9878.00, R^2 = 0.994$   | 180 | 89    |
| 9,10-PQ   | $A = 350875.20 C_{\text{TC}} - 759.00, R^2 = 0.998$    | 208 | 94    |
| 9-Flu     | $A = 1080108.40 C_{\text{TC}} - 16847.50, R^2 = 0.998$ | 180 | 91    |
| 1-NP      | $A = 271550.00 C_{\text{TC}} + 1787.00, R^2 = 0.998$   | 201 | 99    |
| 2-NF      | $A = 327755.60 C_{\text{TC}} + 5415.50, R^2 = 0.999$   | 165 | 97    |
| 2,7-DNF   | $A = 309962.40 C_{\text{TC}} + 1697.00, R^2 = 0.998$   | 164 | 99    |
| 5-NAce    | $A = 284143.60 C_{\text{TC}} + 5567.00, R^2 = 0.998$   | 152 | 100   |
| 9-NAnt    | $A = 375437.60 C_{\text{TC}} + 4257.00, R^2 = 0.999$   | 223 | 101   |

65

66

Table S6. The assignment of FT-IR peaks of BrC.

| Wavenumber (cm <sup>-1</sup> )              | Functional groups                                 |
|---------------------------------------------|---------------------------------------------------|
| > 3000                                      | Stretching of O–H in carboxyl, phenol and alcohol |
| 2934, 2930, 2925, 2924, 2920                | Asymmetric stretching of C–H                      |
| 2857, 2854, 2852, 2850                      | Symmetric stretching of C–H                       |
| 1735, 1730, 1728, 1717, 1688                | Stretching of C=O in carboxylic acid              |
| 1645, 1620, 1615, 1606, 1600                | Stretching of C=O in quinone and ketone           |
| 1531, 1460, 1442, 1436,<br>1420, 1404, 1400 | Stretching of methyl C–H                          |
| 1384, 1335, 1332, 1280                      | Stretching of C–NO <sub>2</sub>                   |
| 1240, 1200, 1171                            | Stretching of aromatic C–O in phenol              |
| 1150, 1131, 1120, 1067                      | Stretching of C–O in polysaccharides              |
| 867, 825, 824, 814, 808, 805                | Out-of-plane bending of aromatic C–H              |

67

68 Table S7. The C–H peak area (cm<sup>-1</sup>) and C–H peak area per unit mass of organic  
69 carbon (C–H<sub>m</sub>, cm<sup>-1</sup> μg<sup>-1</sup>) of BrC.

| Type    | C–H area (cm <sup>-1</sup> ) | C–H <sub>m</sub> (cm <sup>-1</sup> μg <sup>-1</sup> ) |
|---------|------------------------------|-------------------------------------------------------|
| MSBrC   | 16.1                         | 0.07                                                  |
| MIBrC   | 2.07                         | 0.05                                                  |
| WISBrC  | 40.7                         | 0.89                                                  |
| WSBrC   | 5.25                         | 0.03                                                  |
| HULIS-n | 3.70                         | 0.03                                                  |
| HULIS-a | 2.97                         | 0.06                                                  |
| HPWSBrC | 2.96                         | 0.18                                                  |

70

71 Table S8. The molecular formula, concentration (ng m<sup>-3</sup>) and  $MAE_{365}$  (m<sup>2</sup> g<sup>-1</sup>) of  
 72 target compounds.

| Target compounds                                                                           | Molecular formula                             | Concentration<br>(ng m <sup>-3</sup> ) | $MAE_{365}$<br>(m <sup>2</sup> g <sup>-1</sup> ) |
|--------------------------------------------------------------------------------------------|-----------------------------------------------|----------------------------------------|--------------------------------------------------|
| 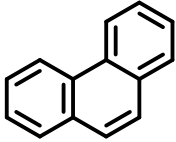<br>Phe   | C <sub>14</sub> H <sub>10</sub>               | 6.47                                   | /                                                |
| <br>Flu   | C <sub>13</sub> H <sub>10</sub>               | 3.46                                   | 0.02                                             |
| <br>Fla  | C <sub>16</sub> H <sub>10</sub>               | 18.9                                   | 5.54                                             |
| <br>Pyr | C <sub>16</sub> H <sub>10</sub>               | 18.10                                  | /                                                |
| <br>Per | C <sub>20</sub> H <sub>12</sub>               | 5.61                                   | 2.24                                             |
| ΣPAHs                                                                                      | /                                             | 52.50                                  | /                                                |
| <br>AQ  | C <sub>14</sub> H <sub>8</sub> O <sub>2</sub> | 1.00                                   | 0.33                                             |

|                                                                                                |                   |       |       |
|------------------------------------------------------------------------------------------------|-------------------|-------|-------|
| 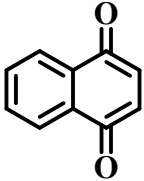<br>1,4-NQ    | $C_{10}H_6O_2$    | 0.69  | 0.92  |
| <br>9-Flu     | $C_{13}H_8O$      | 12.20 | 0.28  |
| <br>1,4-AQ    | $C_{14}H_8O_2$    | 0.79  | 1.76  |
| <br>9,10-PQ  | $C_{14}H_8O_2$    | 3.00  | 1.81  |
| $\Sigma$ OPAHs                                                                                 | /                 | 17.70 | /     |
| <br>5-NAce  | $C_{12}H_9NO_2$   | 8.00  | 8.25  |
| <br>2-NF    | $C_{13}H_9NO_2$   | 5.00  | 9.56  |
| <br>2,7-DNF | $C_{13}H_8N_2O_4$ | 1.16  | 13.20 |

|                                                                                             |                 |       |       |
|---------------------------------------------------------------------------------------------|-----------------|-------|-------|
| 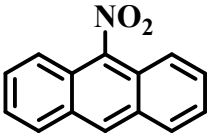<br>9-NAnt | $C_{14}H_9NO_2$ | 0.86  | 5.24  |
| <br>1-NP   | $C_{16}H_9NO_2$ | 8.24  | 11.10 |
| $\Sigma$ NPAHs                                                                              | /               | 23.30 | /     |
| $\Sigma$ Total                                                                              | /               | 93.50 | /     |

73

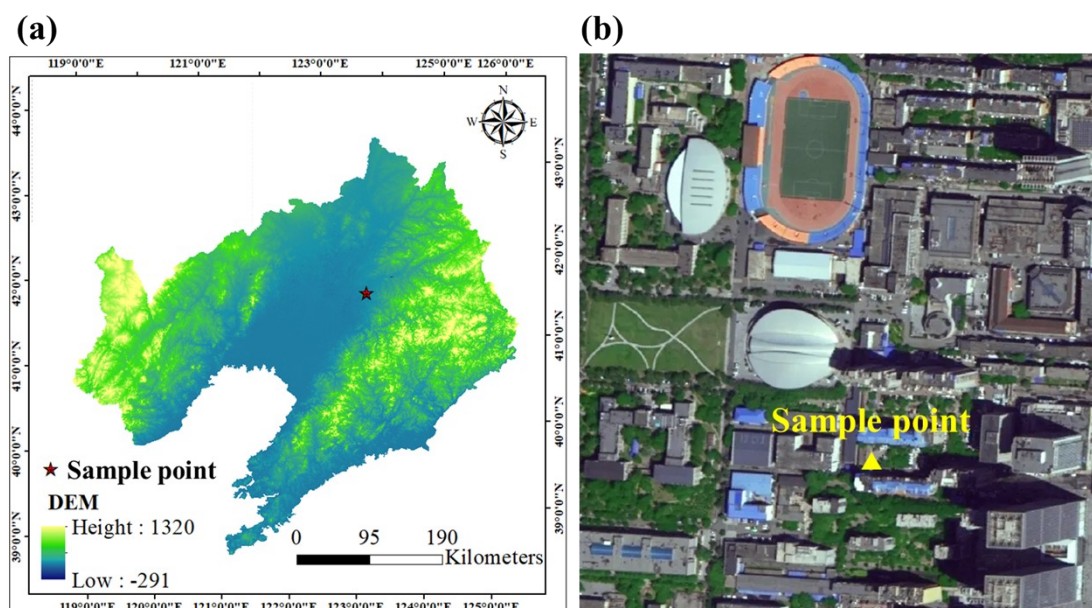

Fig. S1. Geographical coordinates and digital elevation model (DEM) of the sampling point in Liaoning province (a). Overhead view of sample point (b).

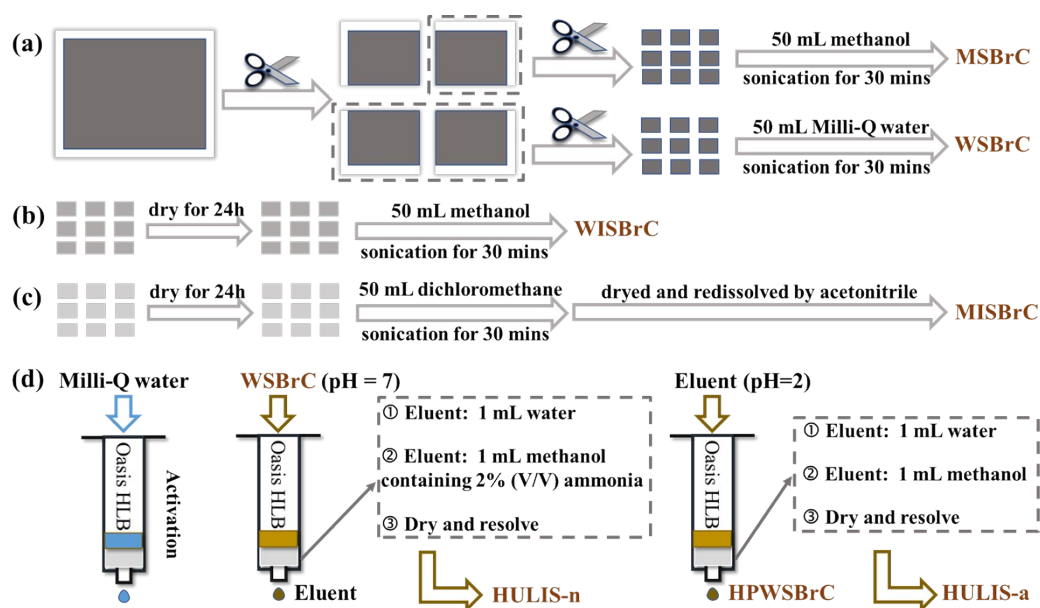

Fig. S2. Separation steps of MSBrC (a), WSBrC (a), WISBrC (b) and MISBrC (c) by sonication extraction, respectively. Separation steps of HULIS (HULIS-n, HULIS-a) and HPWSBrC by SPE method (d).

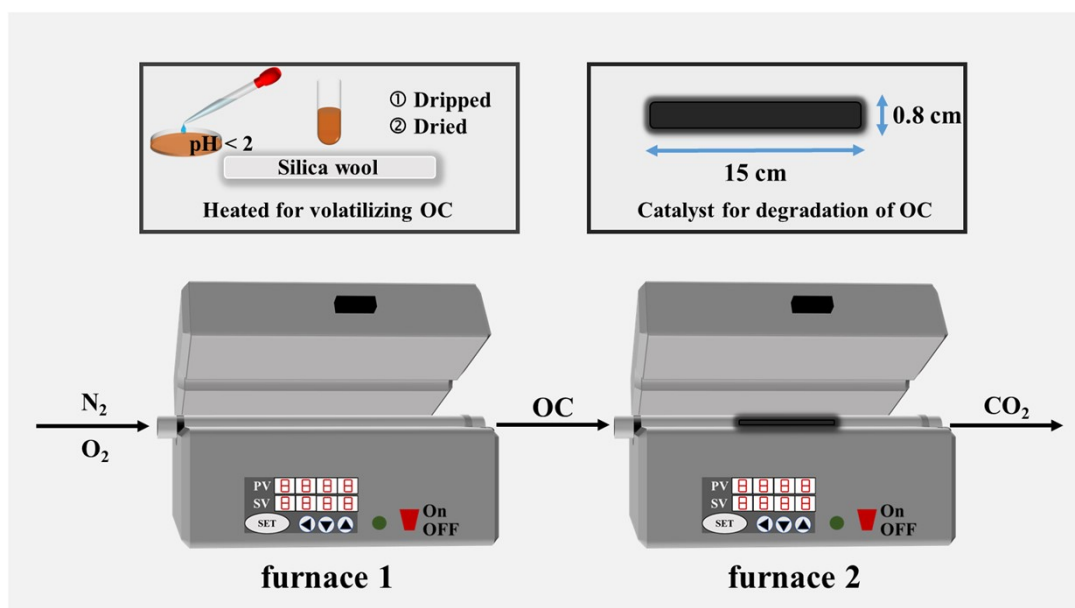

Fig. S3. Schematic diagram of OC concentration detection.

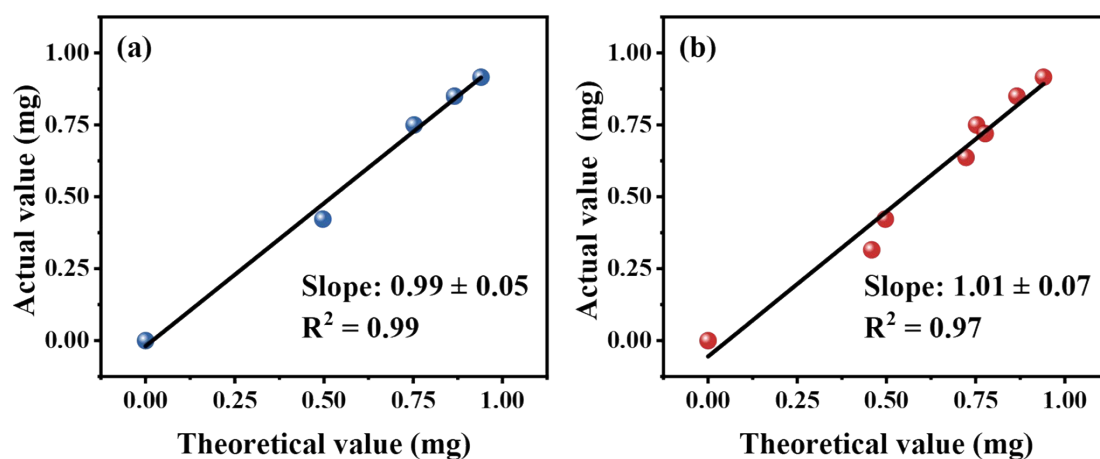

Fig. S4. OC standard curve between actual values measured by GC (mg) and theoretical values (mg) of pyrene (a) and target compounds including pyrene, 9,10-phenanthraquinone, 9-fluorenone, 5-nitroacenaphthene, 9-nitroanthracene, 2-hydroxy-3-nitrobenzoic acid and 2-hydroxy-3-nitrobenzoic acid (b).

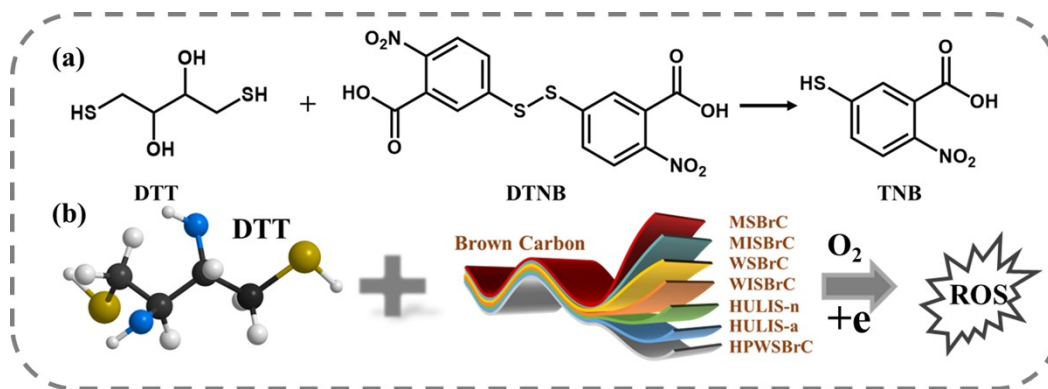

91

92 Fig. S5. Reaction mechanism equation of DTT and DTNB for TNB generation (a) and

93 ROS generation mechanism of DTT and BrC extracts (b).

94

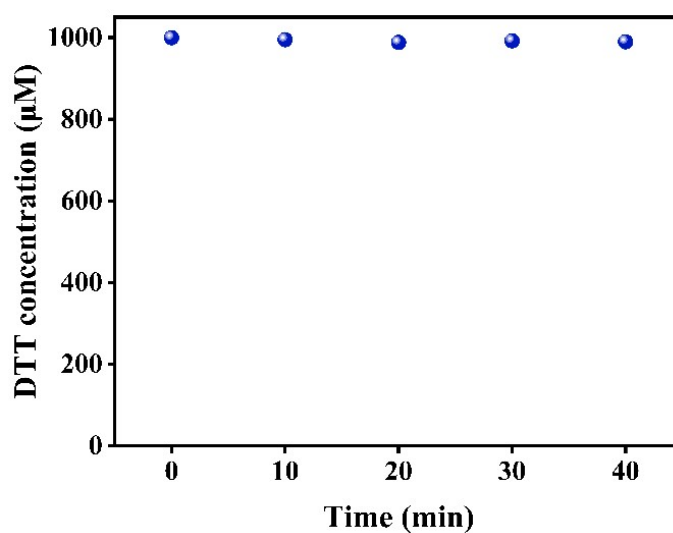

95

96 Fig. S6. DTT measurement for 100 μL of methanol mixed with 2.9 mL of Milli-Q

97 water.

98

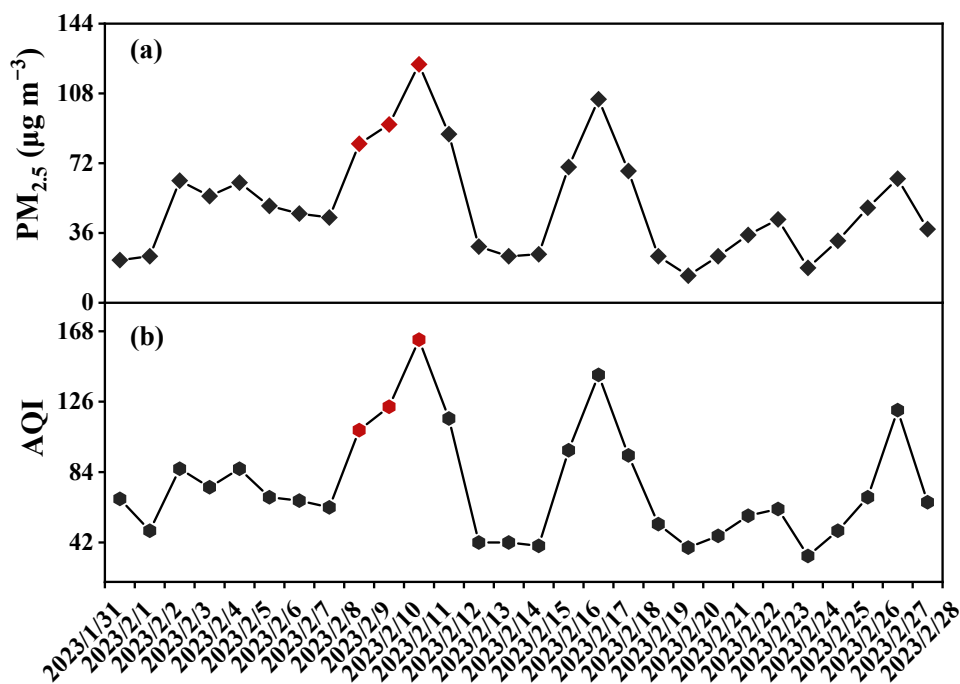

Fig. S7. PM<sub>2.5</sub> concentrations and air quality index (AQI) during Feb. 2023.

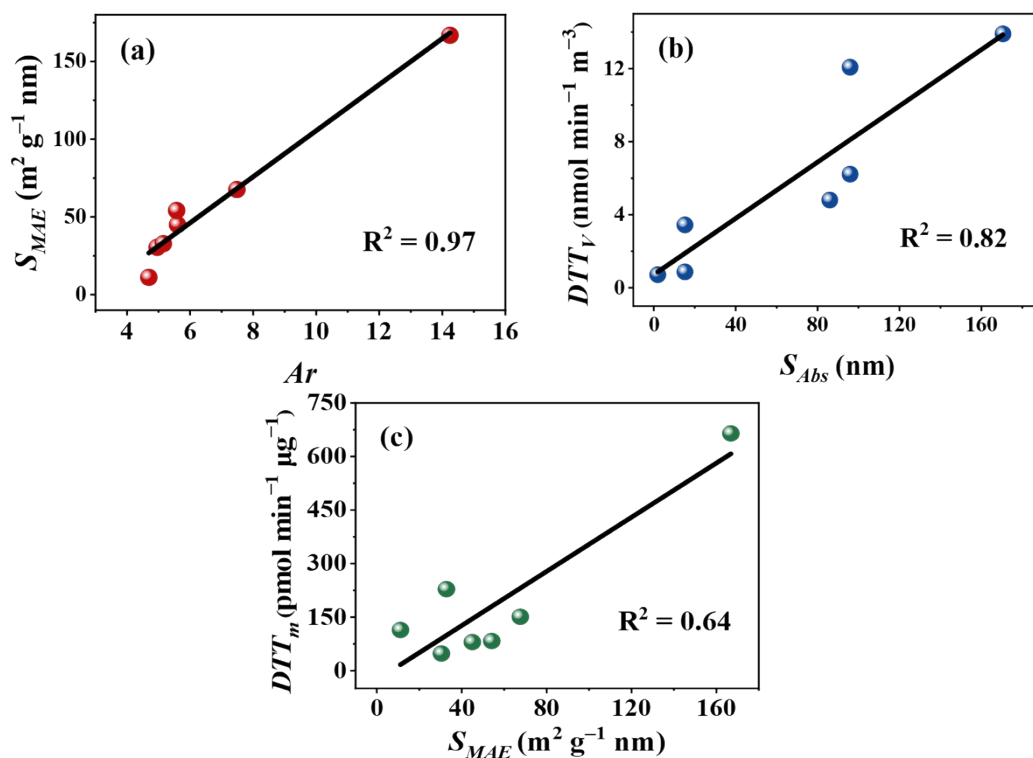

Fig. S8. Correlation analysis of the integral area of *MAE* ( $S_{MAE}$ , m<sup>2</sup> g<sup>-1</sup> nm) with *Ar* (a).

*DTT<sub>V</sub>* (nmol min<sup>-1</sup> m<sup>-3</sup>) with the integral area of *Abs* ( $S_{Abs}$ , nm) (b). *DTT<sub>m</sub>* with  $S_{MAE}$

(c).

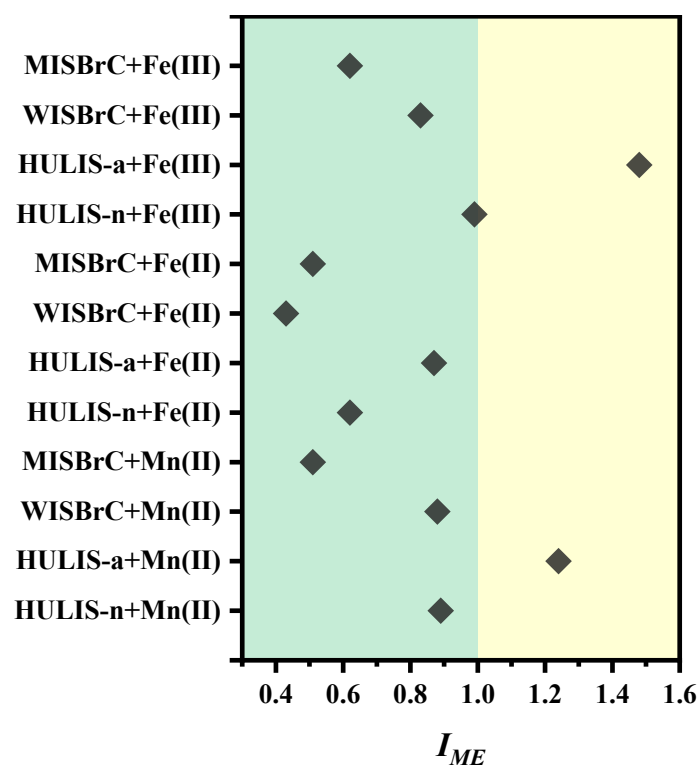

106

107 Fig. S9. The mix effect index ( $I_{ME}$ ) of metal ions ( $Fe^{2+}$ ,  $Fe^{3+}$  and  $Mn^{2+}$ ) with the metal  
 108 free BrC extracts (MISBrC, WISBrC, HULIS-a and HULIS-n).

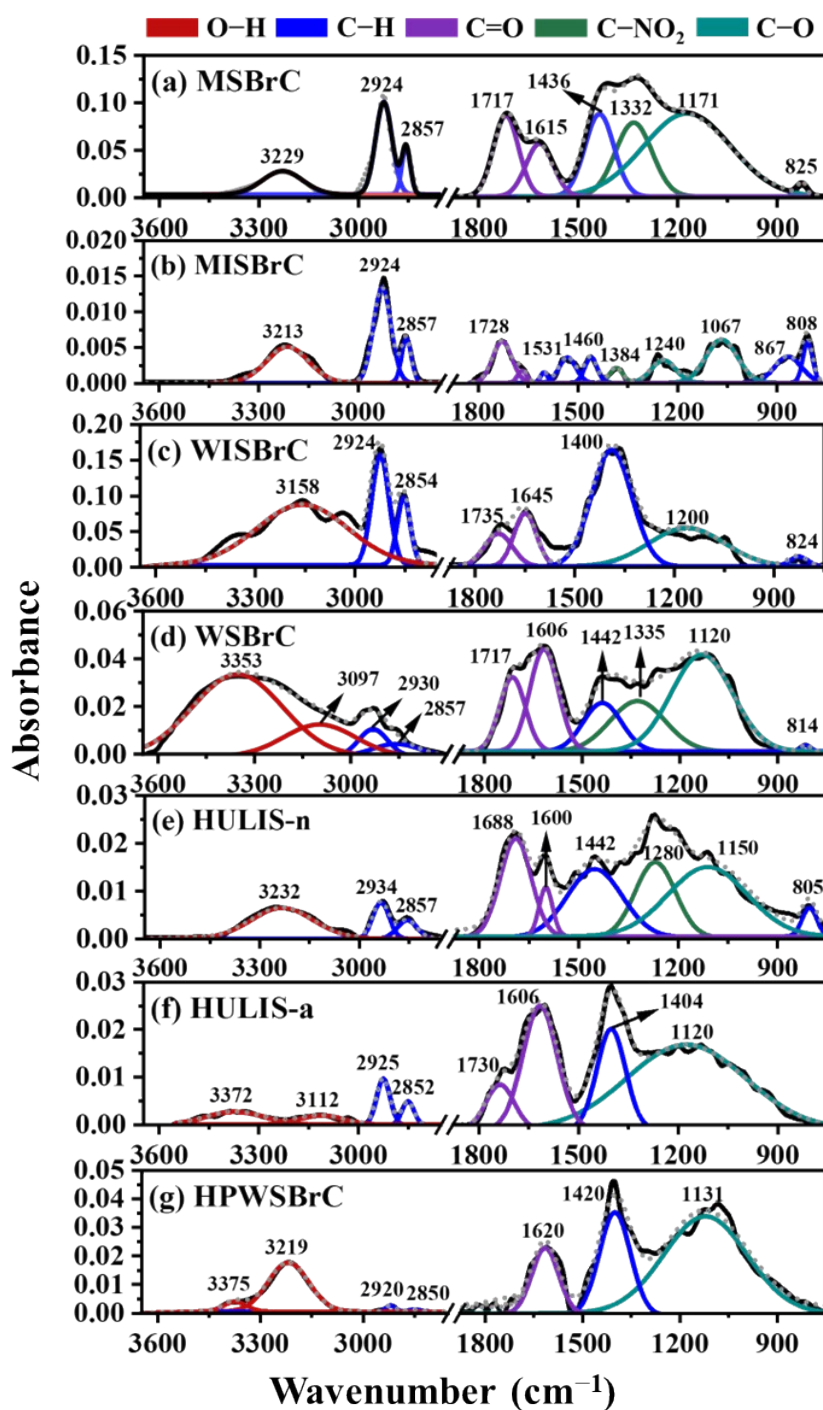

109

110 Fig. S10. The curve-fitting of FT-IR spectra of MSBrC (a), MISBrC (b), WISBrC (c),  
 111 WSBrc (d), HULIS-n (e), HULIS-a (f) and HPWSBrC (g). The black, grey and  
 112 colorful lines represent the original, fitted and separated spectra, respectively.

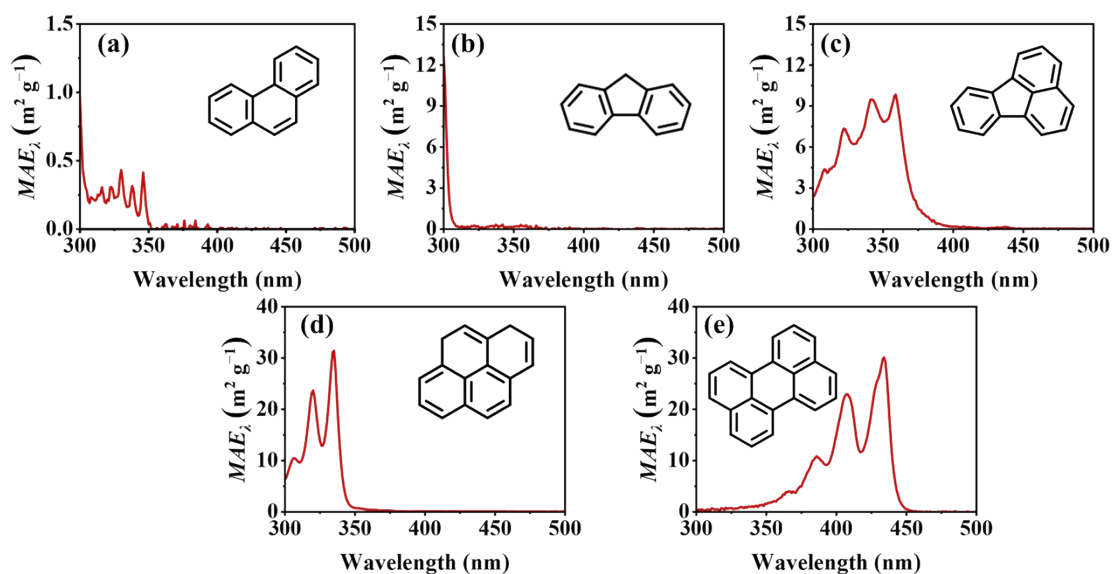

Fig. S11. The  $MAE$  spectra of phenanthrene (a), fluorene (b), fluoranthene (c), pyrene (d) and perylene (e).

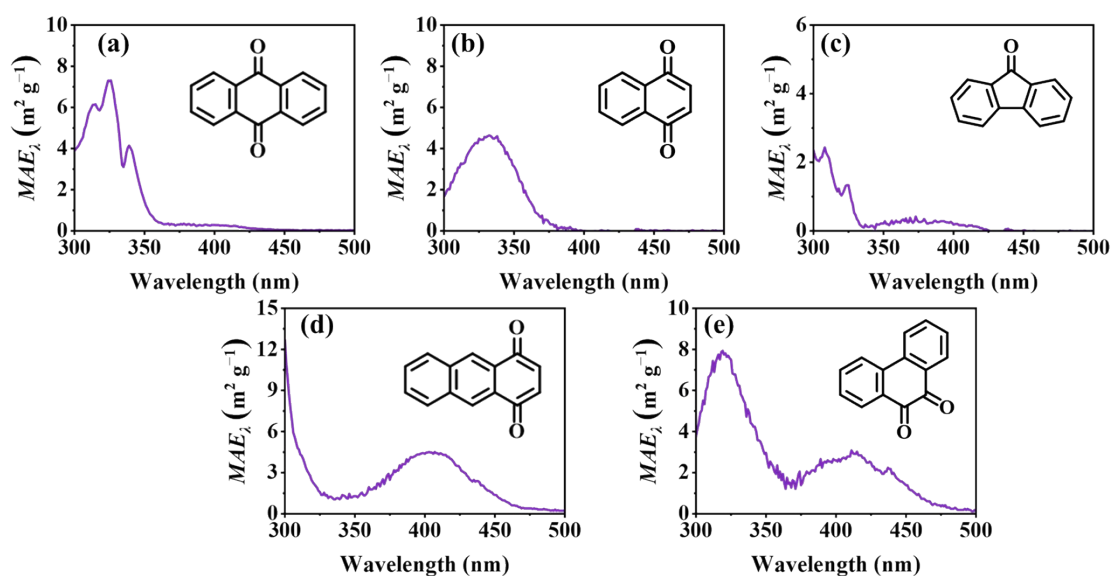

Fig. S12. The  $MAE$  spectra of anthraquinone (a), naphthalene-1,4-dione (b), 9-fluorenone (c), 1,4-anthraquinone (d) and 9,10-phenanthraquinone (e).

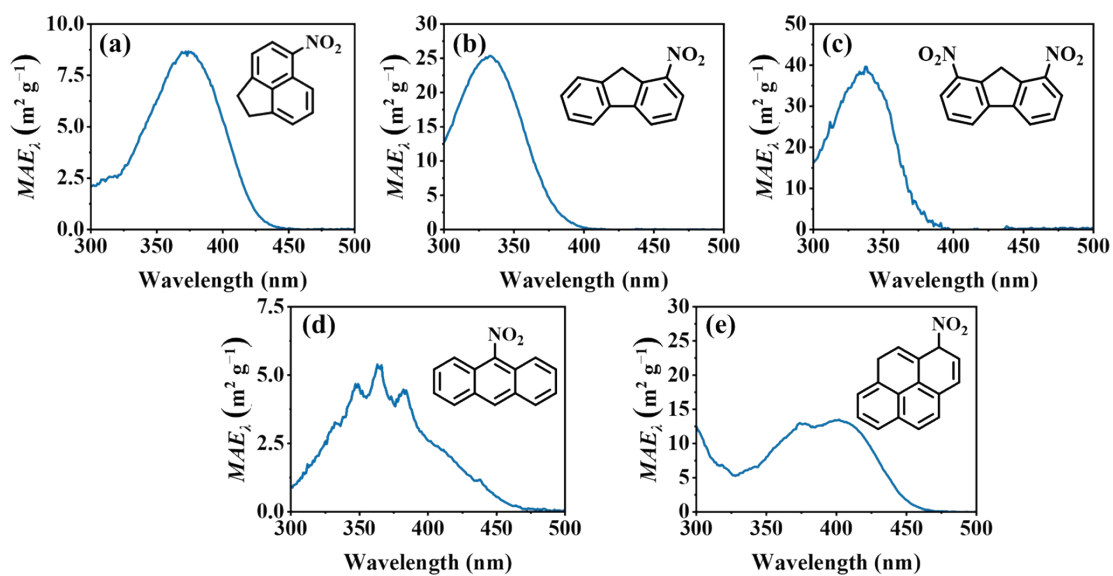

120

121 Fig. S13. The  $MAE$  spectra of 5-nitroacenaphthene (a), 2-nitrofluorene (b), 2,7-

122 dinitrofluorene (c), 9-nitroanthracene (d) and 1-nitropyrene (e).
